# Supplementary material for: PDZD8 Augments Endoplasmic Reticulum-Mitochondria Contact and Regulates Ca2+ Dynamics and Cypd Expression to Induce Pancreatic β-Cell Death during Diabetes
Source: PubMed Central journal article supplement — Diabetes Metab J. 2024 Jul 29;48(6):1058–72. doi: 10.4093/dmj.2023.0275 (PMC11621647; doi:10.4093/dmj.2023.0275), 2024-07-29
Supplement: dmj-2023-0275-Supplementary-Fig-2.pdf [file dmj-2023-0275-Supplementary-Fig-2.pdf]

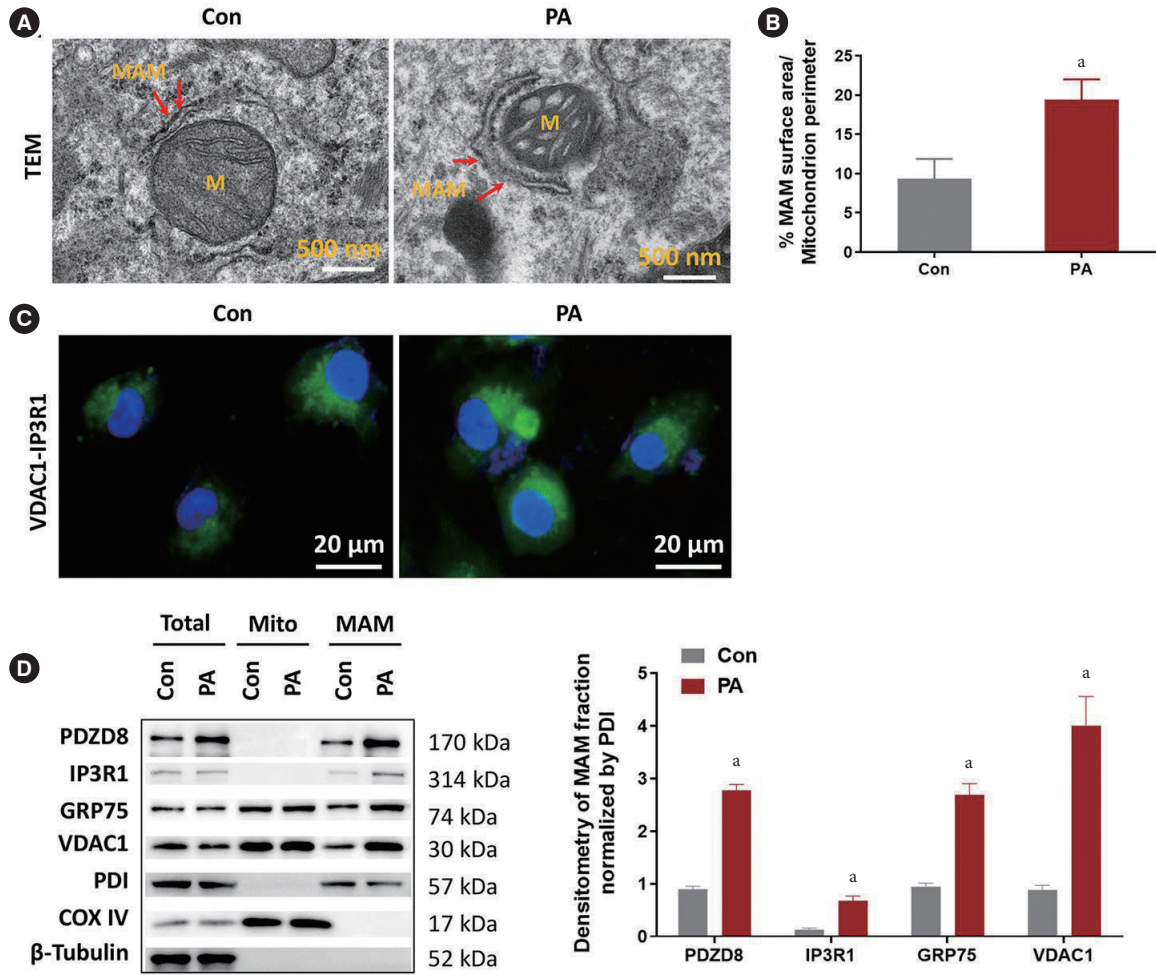

**Supplementary Fig. 2.** Palmitic acid (PA) increases mitochondria-associated endoplasmic reticulum membrane (MAM) formation and PDZ domain-containing 8 (PDZD8) expression in insulin 1 (INS-1) cells. (A, B) The MAM in INS-1 cells was measured using the transmission electron microscopy (TEM). The red arrows point to MAM. (C) The interaction between voltage-dependent anion-selective channel 1 (VDAC1) and inositol 1,4,5-triphosphate receptor type 1 (IP3R1) was detected using the proximity ligation assay. (D) The protein expression of PDZD8 and MAM-related proteins in INS-1 cells were detected by Western blotting. Con, control; M, mitochondria; GRP75, glucose-regulated protein 75; PDI, protein disulfide isomerase; COX IV, cytochrome c oxidase 4. <sup>a</sup>*P*<0.05.
